# Supplementary material for: Nimbolide B and Nimbic Acid B, Phytotoxic Substances in Neem Leaves with Allelopathic Activity
Source: MDPI journal article supplement (doi:10.3390/molecules19066929), 2014-05-26
Supplement: s1 [file s1]

## Supplementary Materials

**Figure S1.**  $^1\text{H}$  NMR spectrum of compound **1** (400 MHz,  $\text{CDCl}_3$ ).

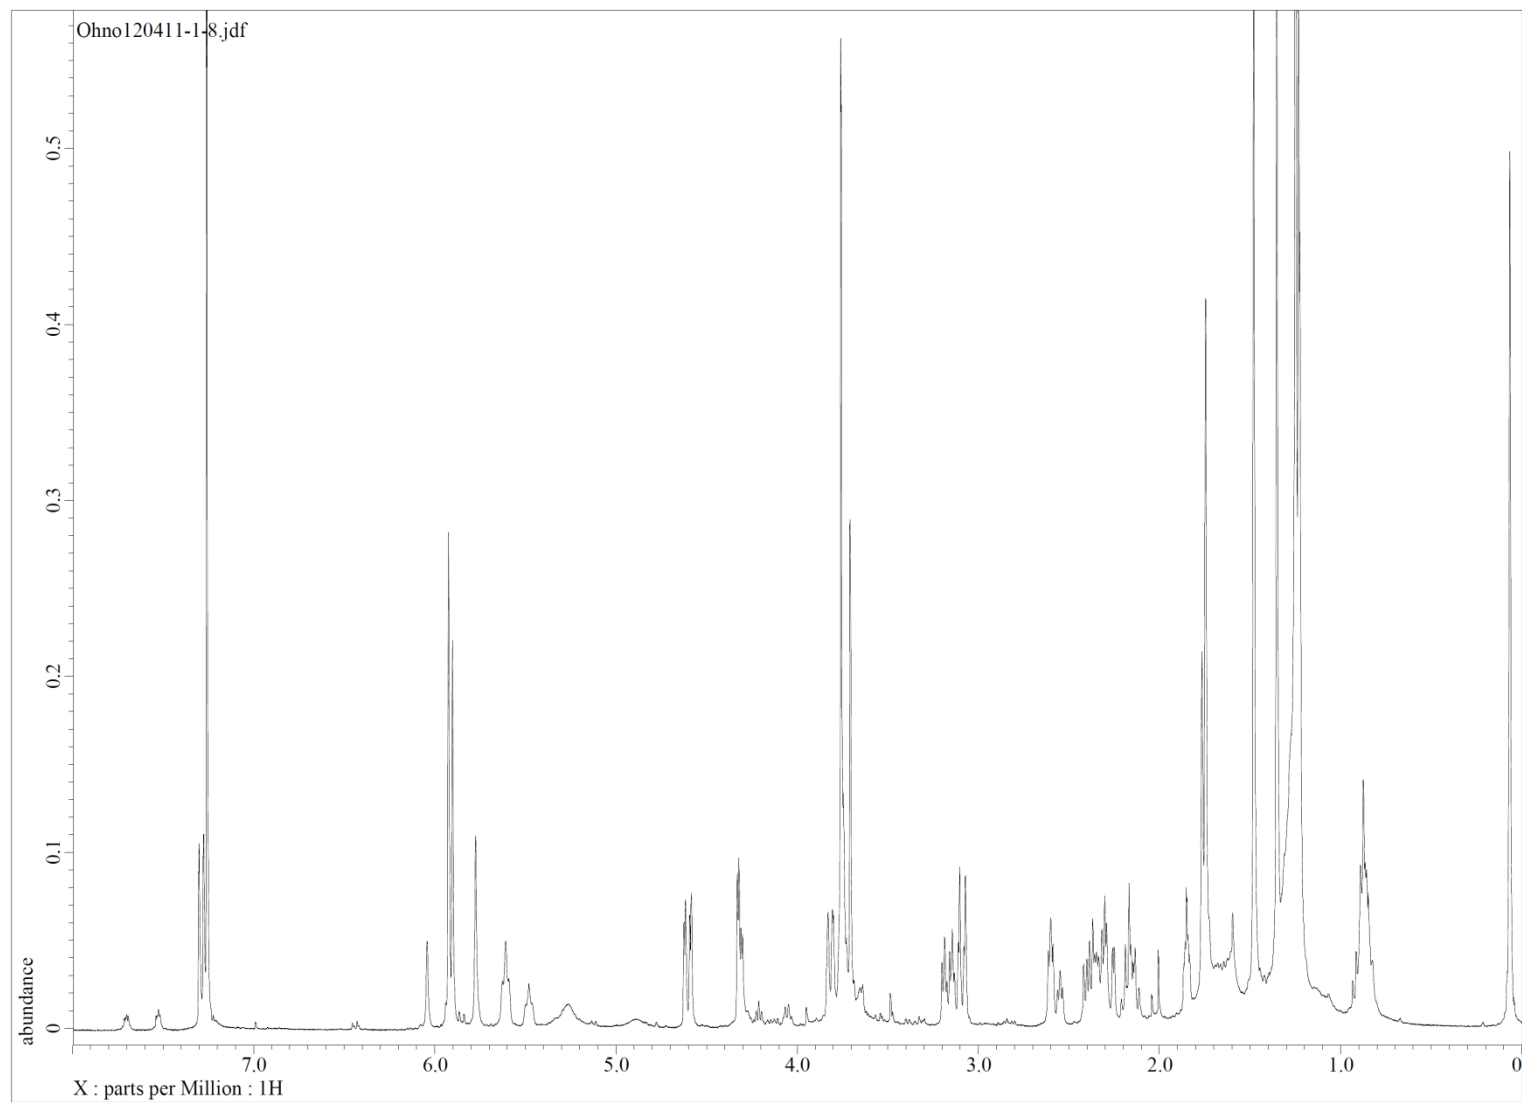

**Figure S2.**  $^{13}\text{C}$  NMR spectrum of compound **1** (100 MHz,  $\text{CDCl}_3$ ).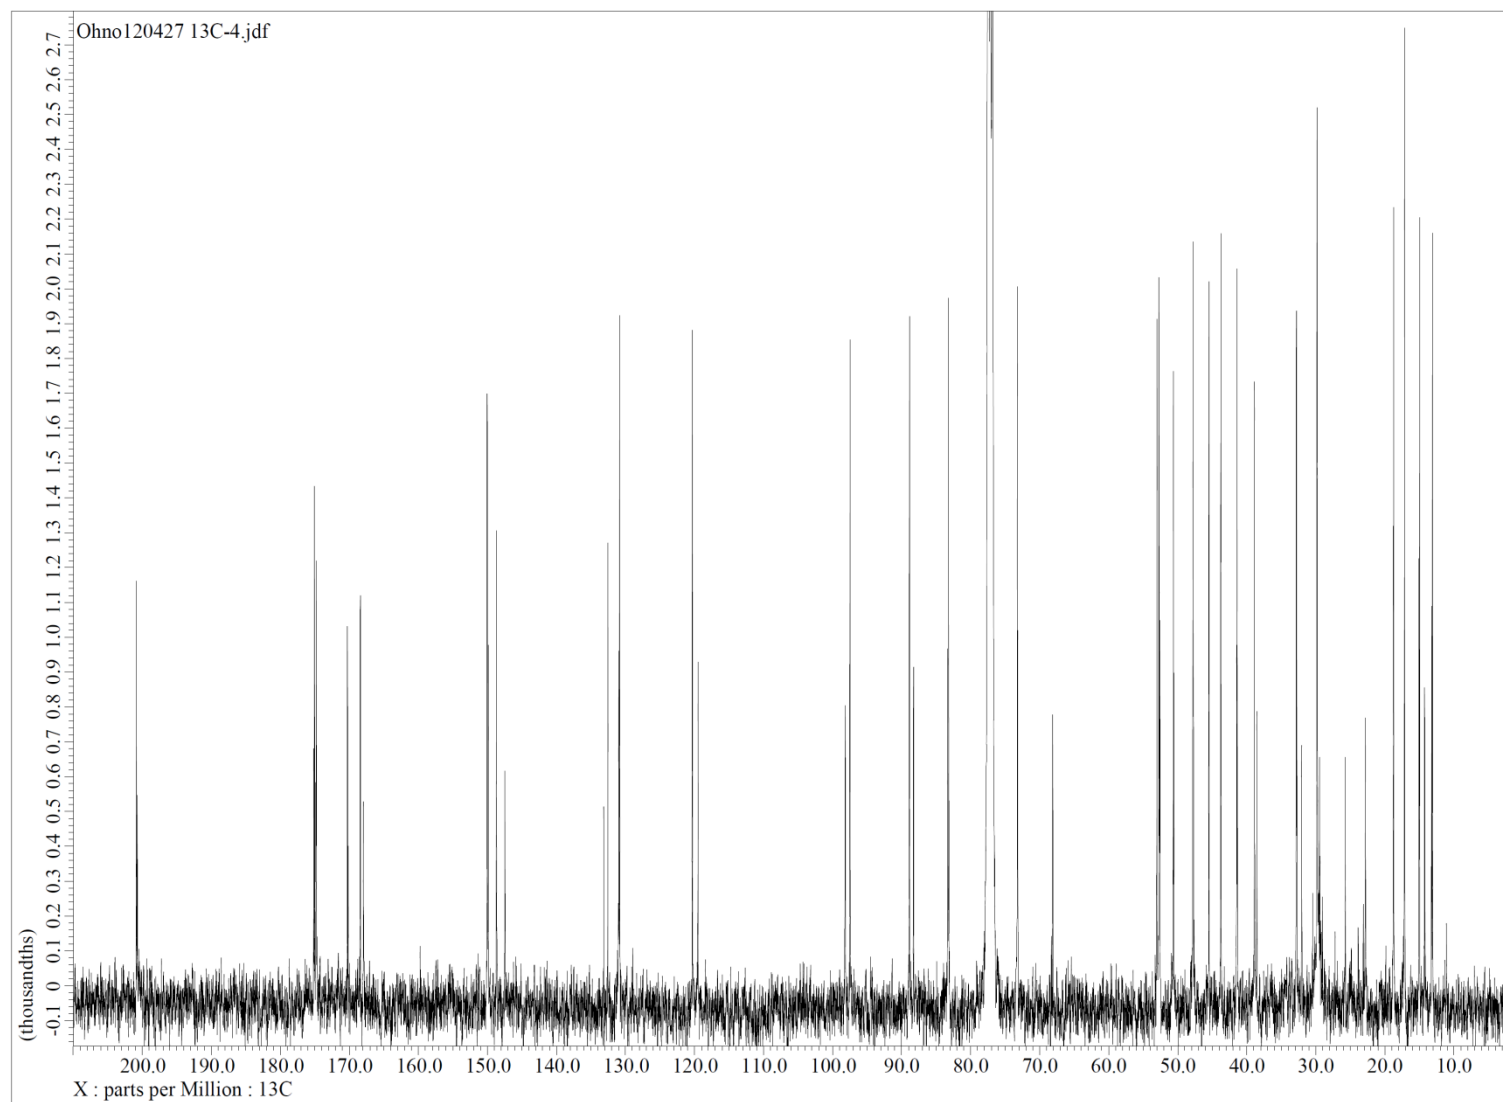

**Figure S3.** COSY spectrum of compound **1** (400 MHz, CDCl<sub>3</sub>).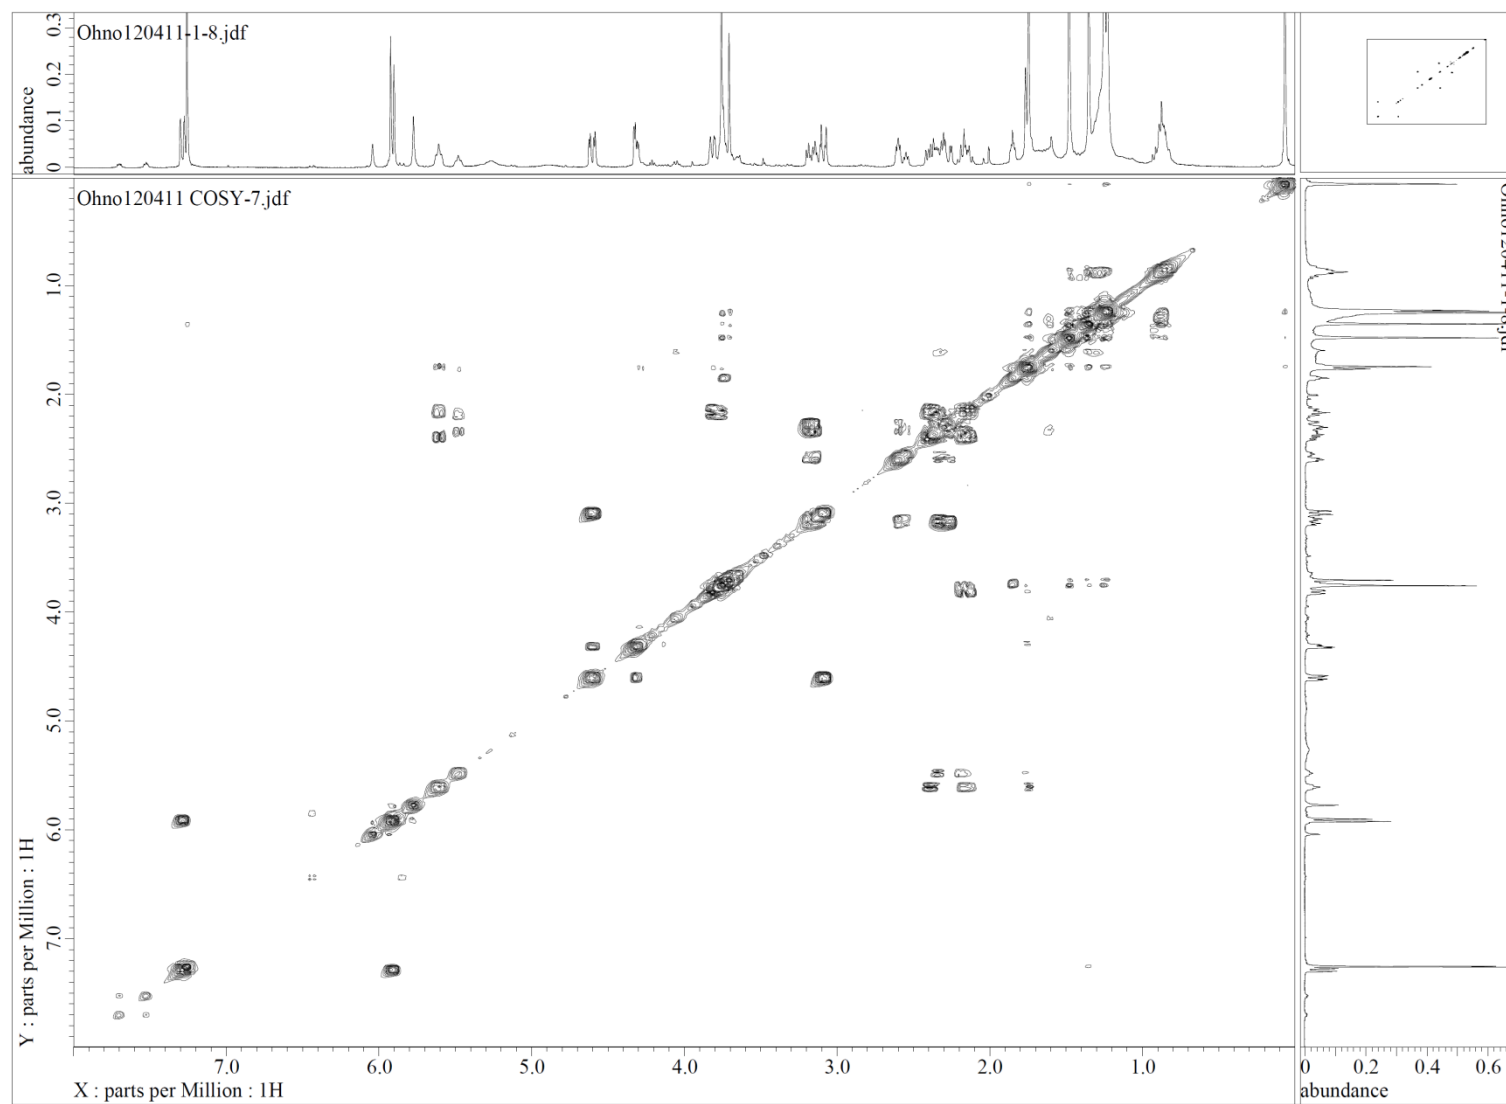

**Figure S4.** HMQC spectrum of compound **1** (400 MHz,  $\text{CDCl}_3$ ).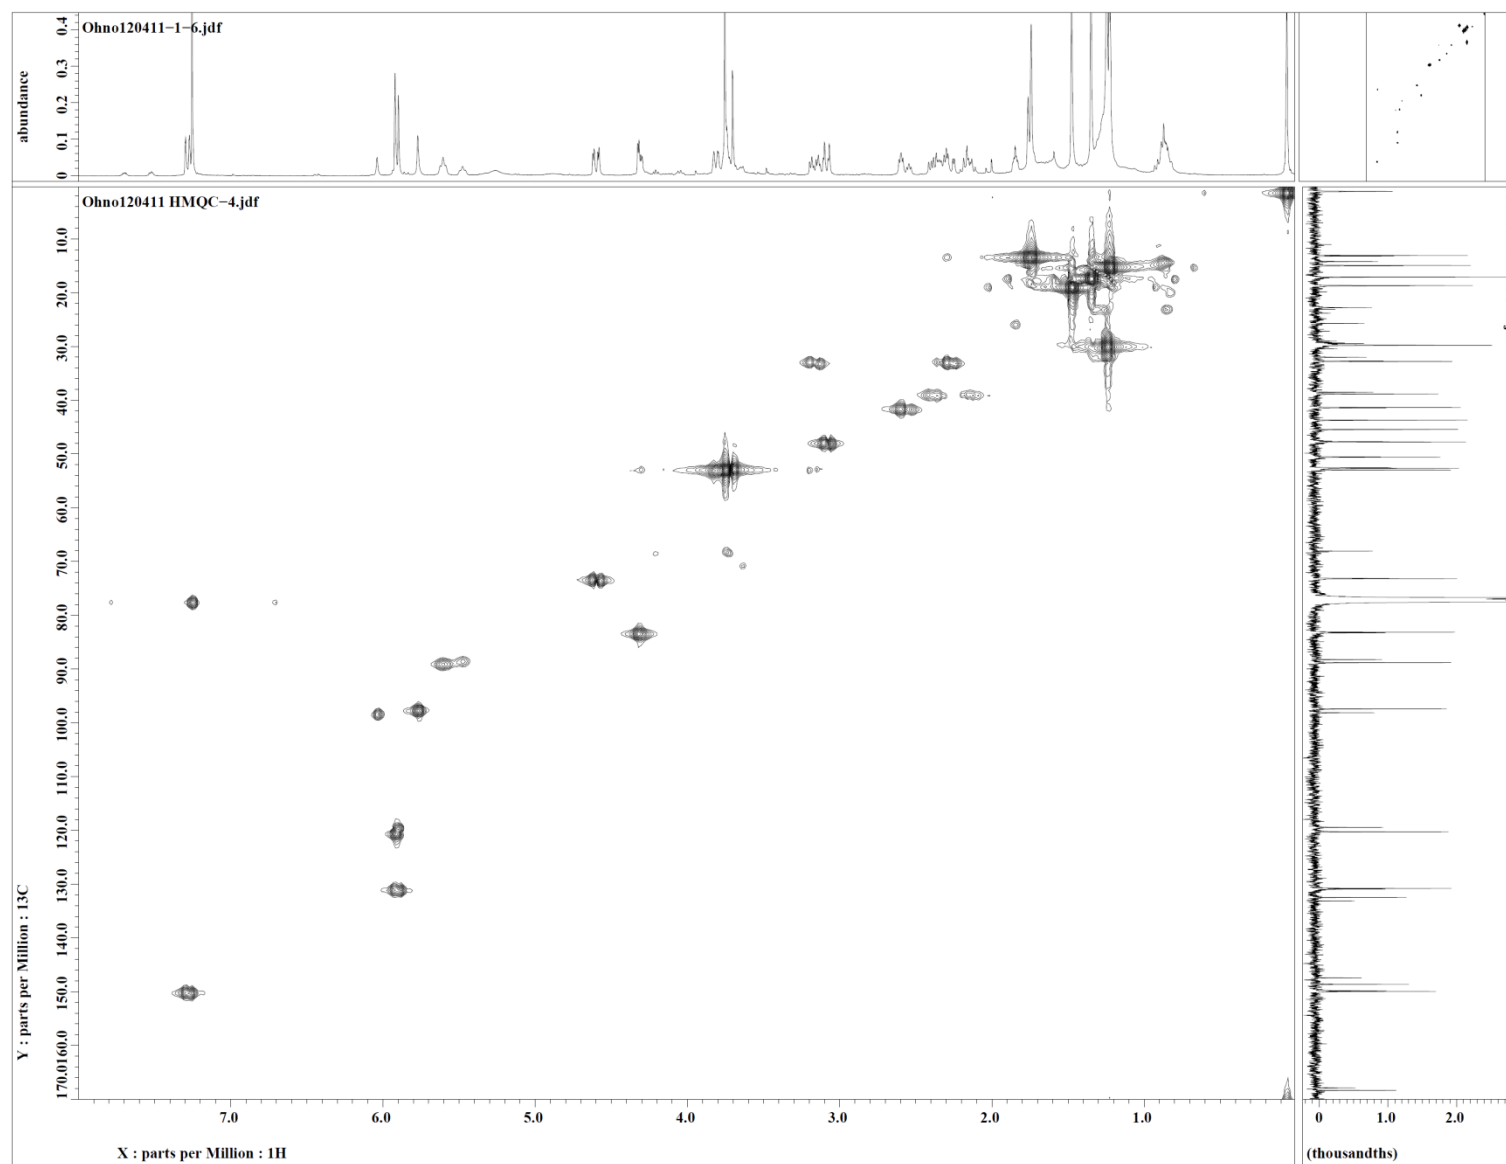

**Figure S5.** HMBC spectrum of compound **1** (400 MHz, CDCl<sub>3</sub>).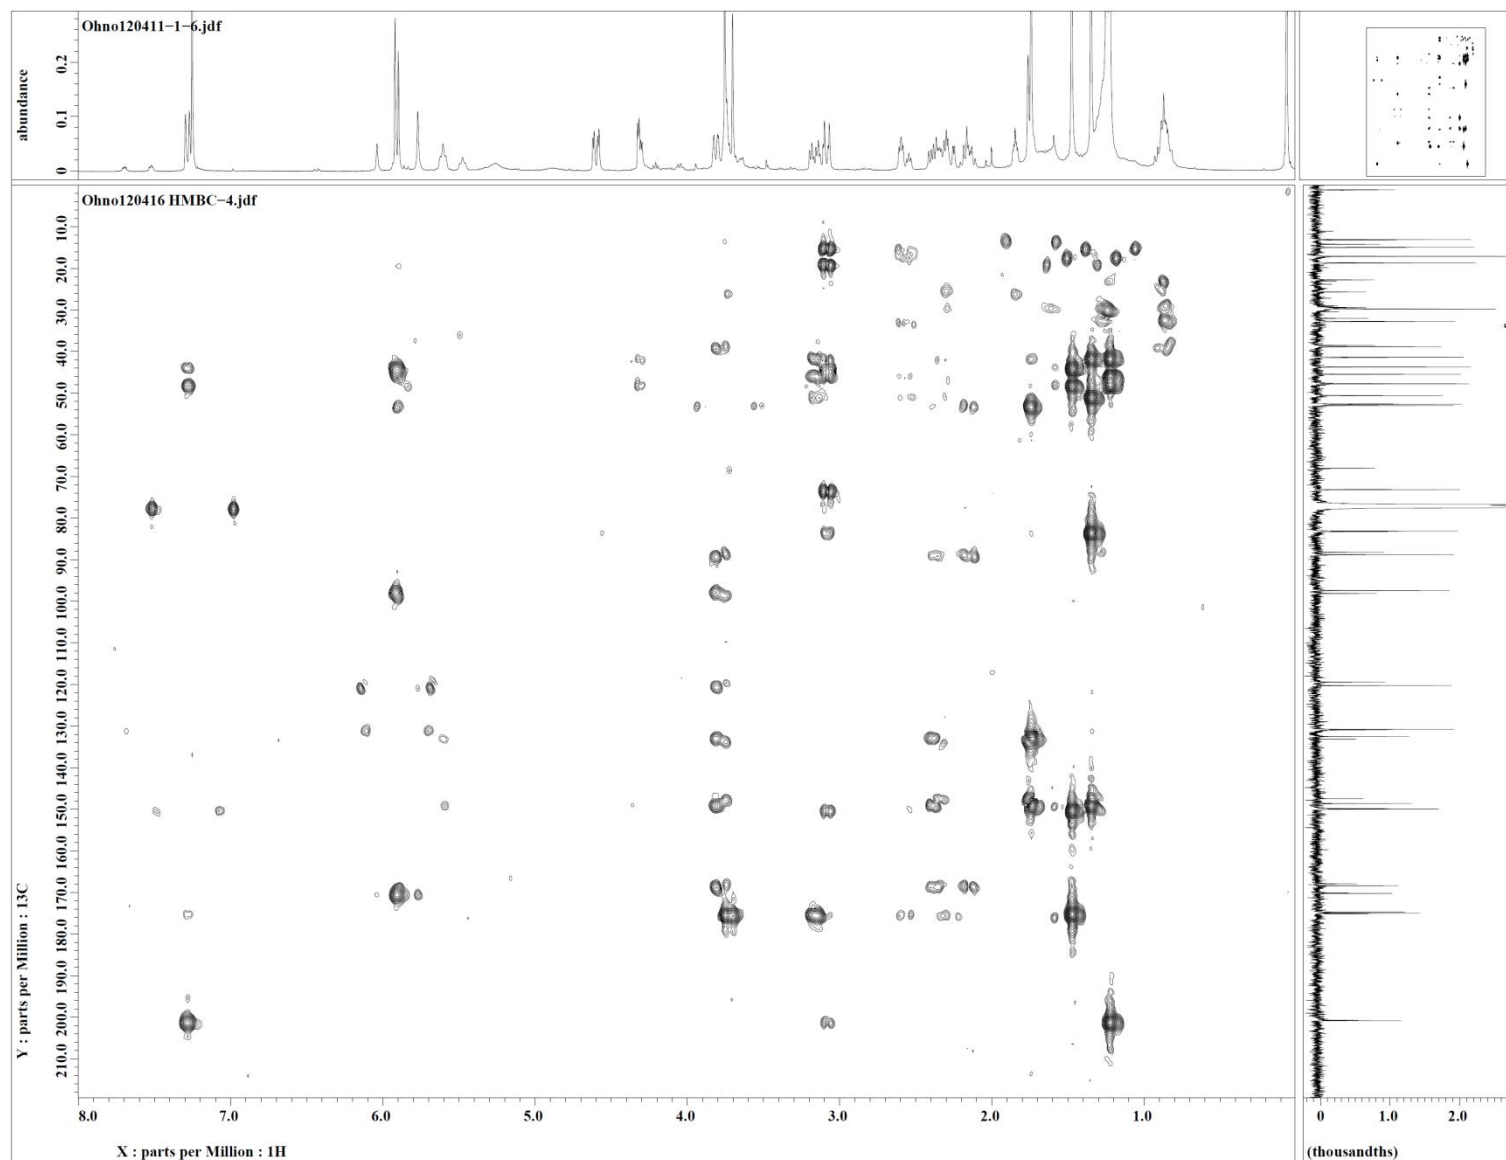

**Figure S6.** NOESY spectrum of compound **1** (400 MHz,  $\text{CDCl}_3$ ).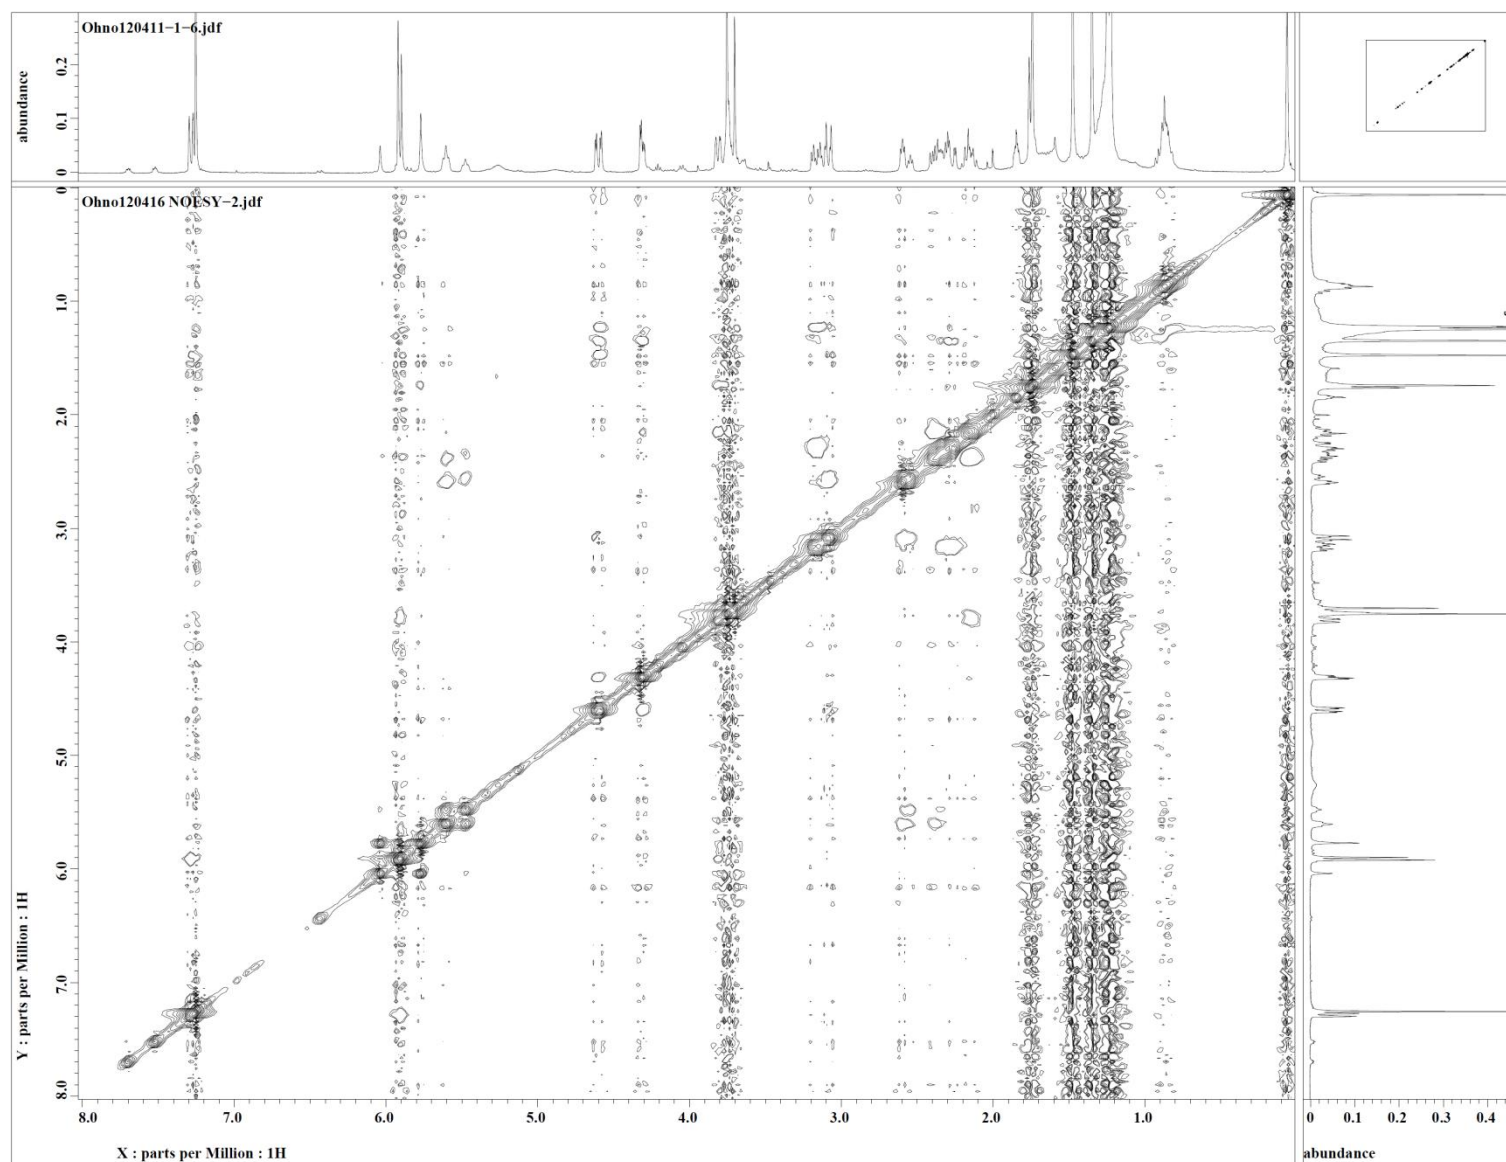

Figure S7. IR spectrum of compound 1 (neat).

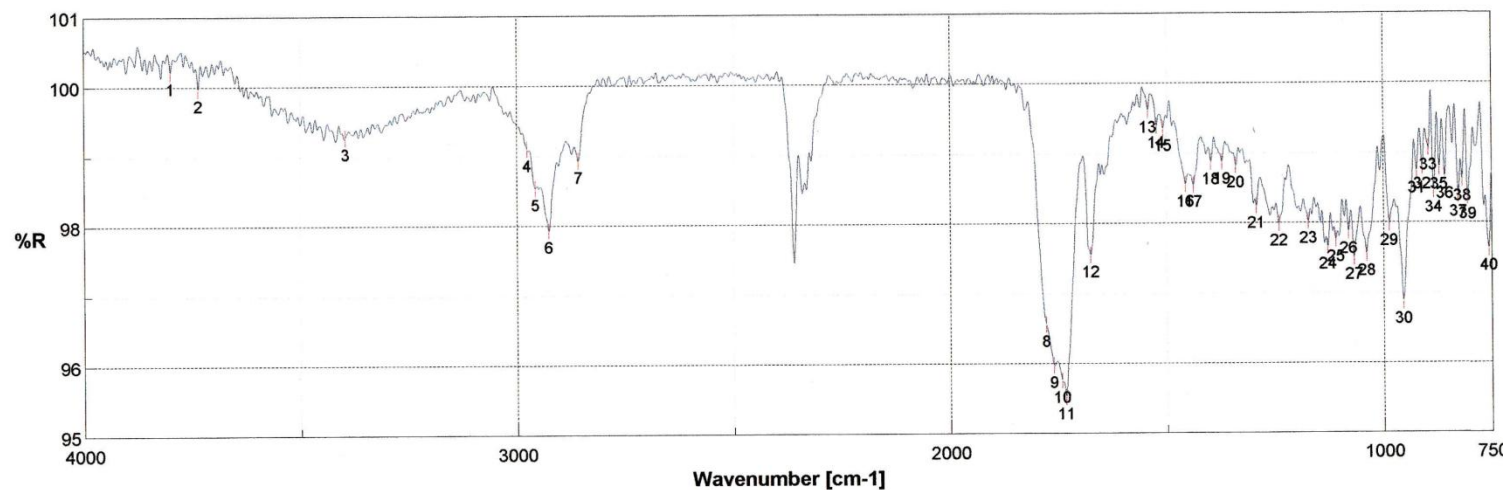

積算回数 64  
 ゼロフィリング ON  
 ゲイン 32  
 スキャンスピード 2 mm/sec  
 測定日時 2012/05/02 19:05  
 測定者 オペレータ  
 ファイル名 Memory#1  
 サンプル名 試料名  
 コメント

分解 4 cm-1  
 アポダイゼーション Cosine  
 アパーチャ 7.1 mm  
 更新日時 2012/05/02 19:08

| No. | cm-1    | %R      | No. | cm-1    | %R      | No. | cm-1    | %R      | No. | cm-1    | %R      |
|-----|---------|---------|-----|---------|---------|-----|---------|---------|-----|---------|---------|
| 1   | 3799.08 | 100.218 | 2   | 3734.48 | 99.9664 | 3   | 3395.07 | 99.2714 | 4   | 2975.62 | 99.1029 |
| 6   | 2926.45 | 97.9313 | 7   | 2857.99 | 98.9326 | 8   | 1779.97 | 96.5604 | 9   | 1761.65 | 95.9714 |
| 11  | 1733.69 | 95.5271 | 12  | 1675.84 | 97.5557 | 13  | 1542.77 | 99.6154 | 14  | 1523.49 | 99.3995 |
| 16  | 1456.96 | 98.5577 | 17  | 1438.64 | 98.552  | 18  | 1398.14 | 98.8718 | 19  | 1372.1  | 98.878  |
| 21  | 1293.04 | 98.2439 | 22  | 1240.97 | 97.9935 | 23  | 1173.47 | 98.026  | 24  | 1128.15 | 97.6598 |
| 26  | 1080.91 | 97.8759 | 27  | 1067.41 | 97.5056 | 28  | 1038.48 | 97.5579 | 29  | 986.411 | 97.9847 |
| 31  | 922.771 | 98.7337 | 32  | 909.272 | 98.7921 | 33  | 895.773 | 99.0651 | 34  | 883.238 | 98.456  |
| 36  | 857.204 | 98.6539 | 37  | 826.348 | 98.3967 | 38  | 816.706 | 98.6172 | 39  | 805.135 | 98.3615 |
|     |         |         |     |         |         |     |         |         | 5   | 2957.3  | 98.5393 |
|     |         |         |     |         |         |     |         |         | 10  | 1743.33 | 95.762  |
|     |         |         |     |         |         |     |         |         | 15  | 1508.06 | 99.3507 |
|     |         |         |     |         |         |     |         |         | 20  | 1340.28 | 98.8287 |
|     |         |         |     |         |         |     |         |         | 25  | 1109.83 | 97.7636 |
|     |         |         |     |         |         |     |         |         | 30  | 953.627 | 96.8754 |
|     |         |         |     |         |         |     |         |         | 35  | 869.739 | 98.7892 |
|     |         |         |     |         |         |     |         |         | 40  | 756.923 | 97.6284 |

**Figure S8.**  $^1\text{H}$  NMR spectrum of compound **2** (400 MHz,  $\text{CDCl}_3$ ).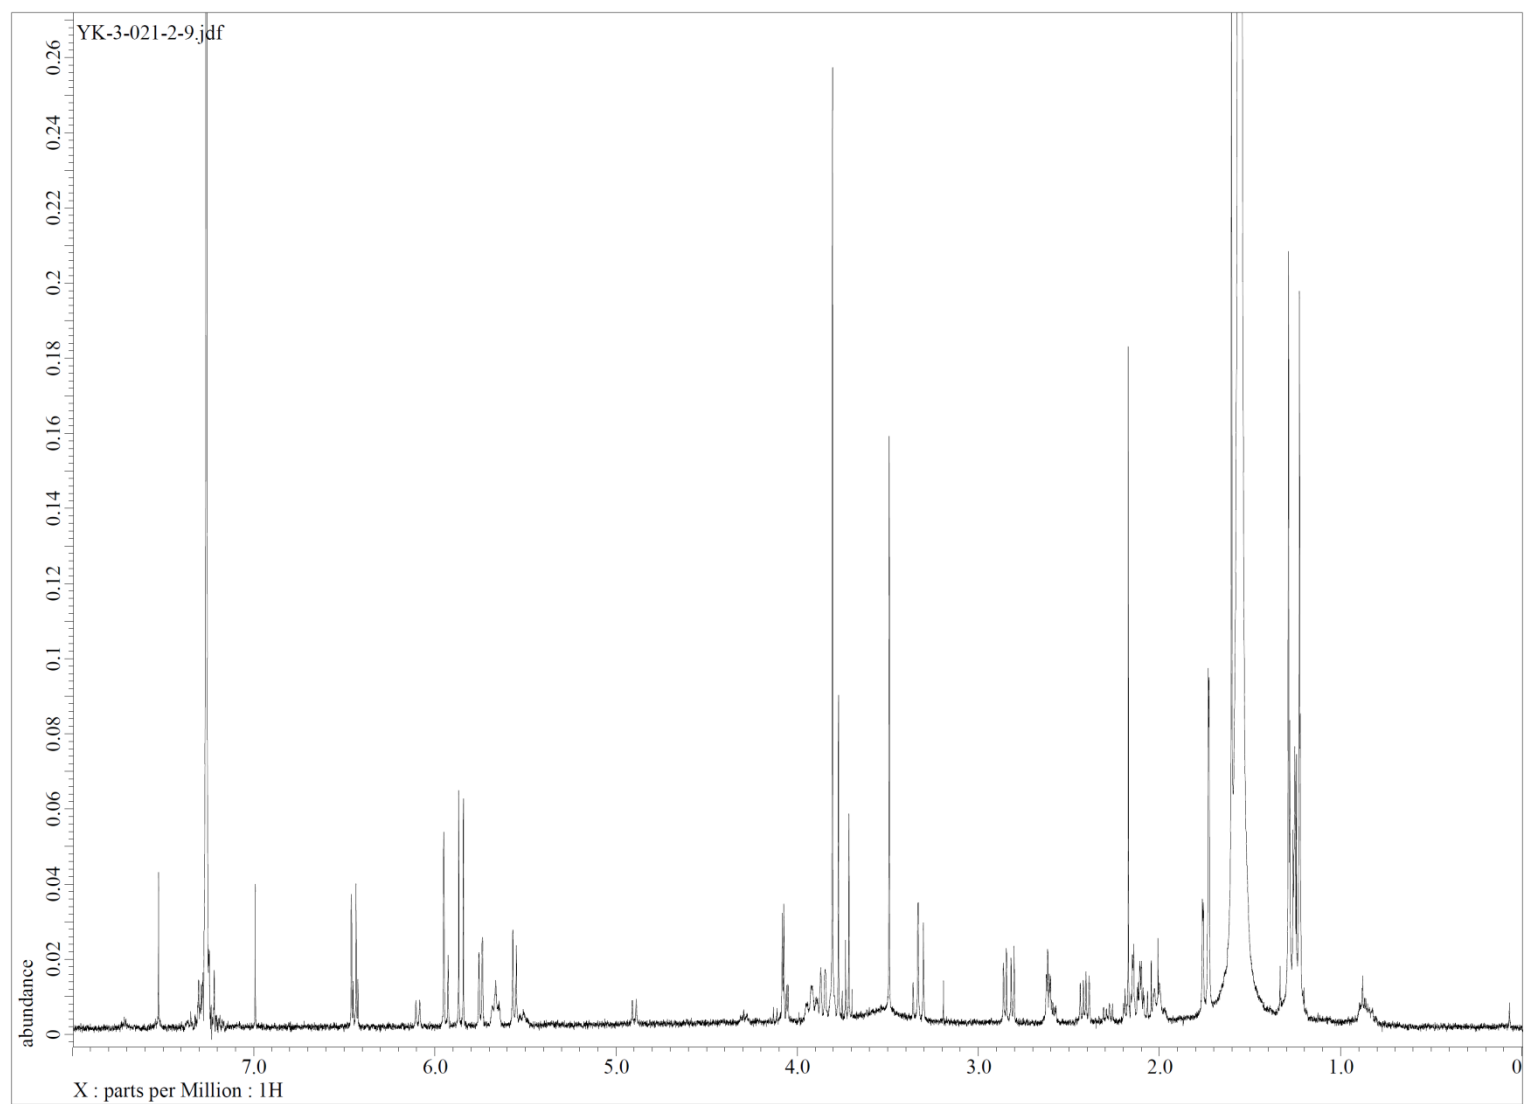



**Figure S9.** COSY spectrum of compound **2** (400 MHz, CDCl<sub>3</sub>).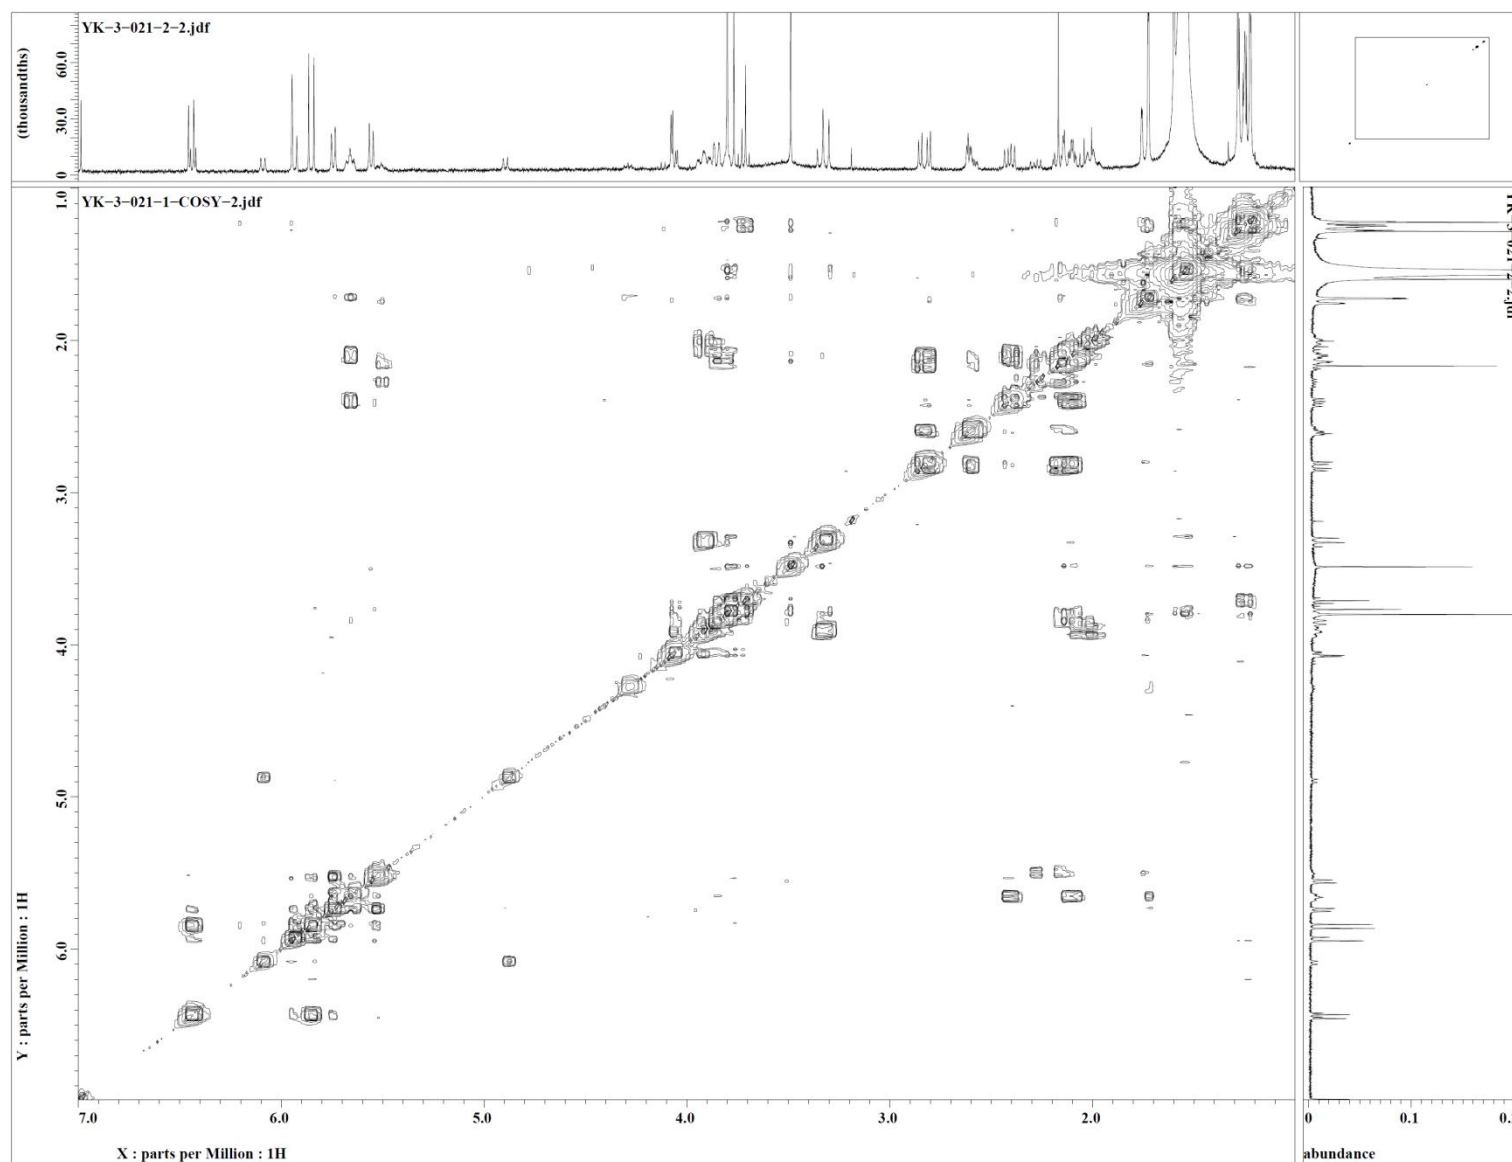

**Figure S10.** HMQC spectrum of compound **2** (400 MHz, CDCl<sub>3</sub>).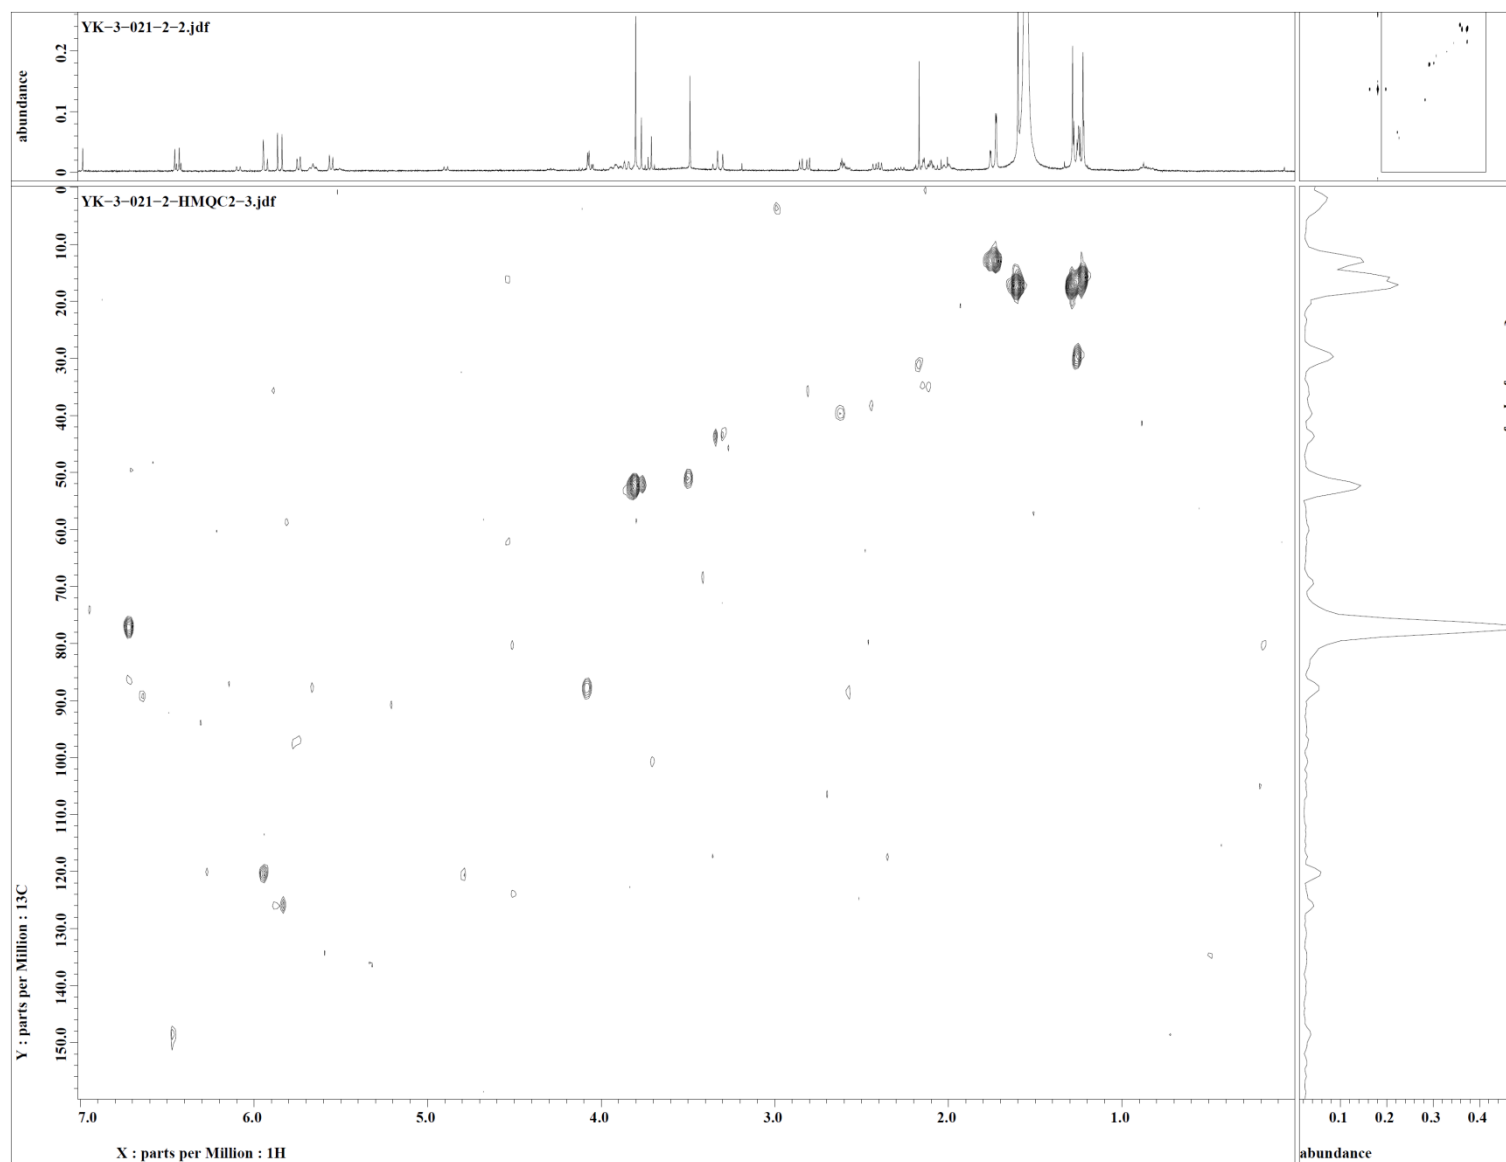

**Figure S11.** HMBC spectrum of compound **2** (400 MHz, CDCl<sub>3</sub>).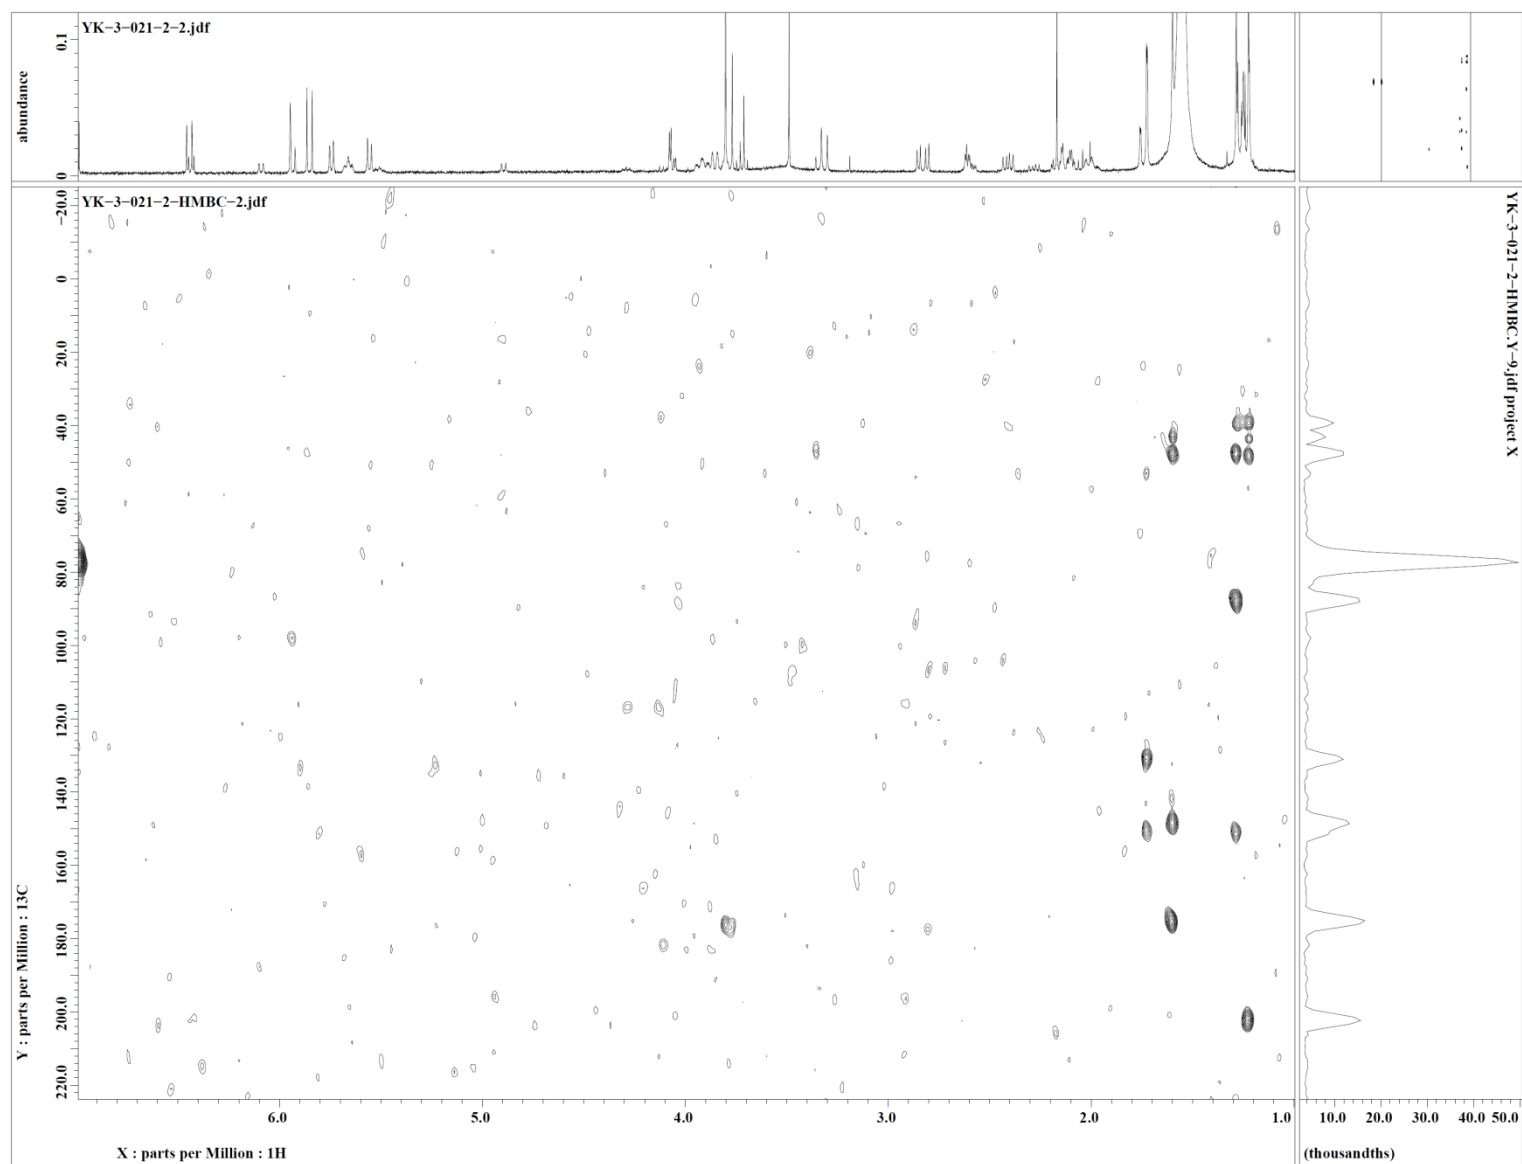

**Figure S12.** NOESY spectrum of compound **2** (400 MHz, CDCl<sub>3</sub>).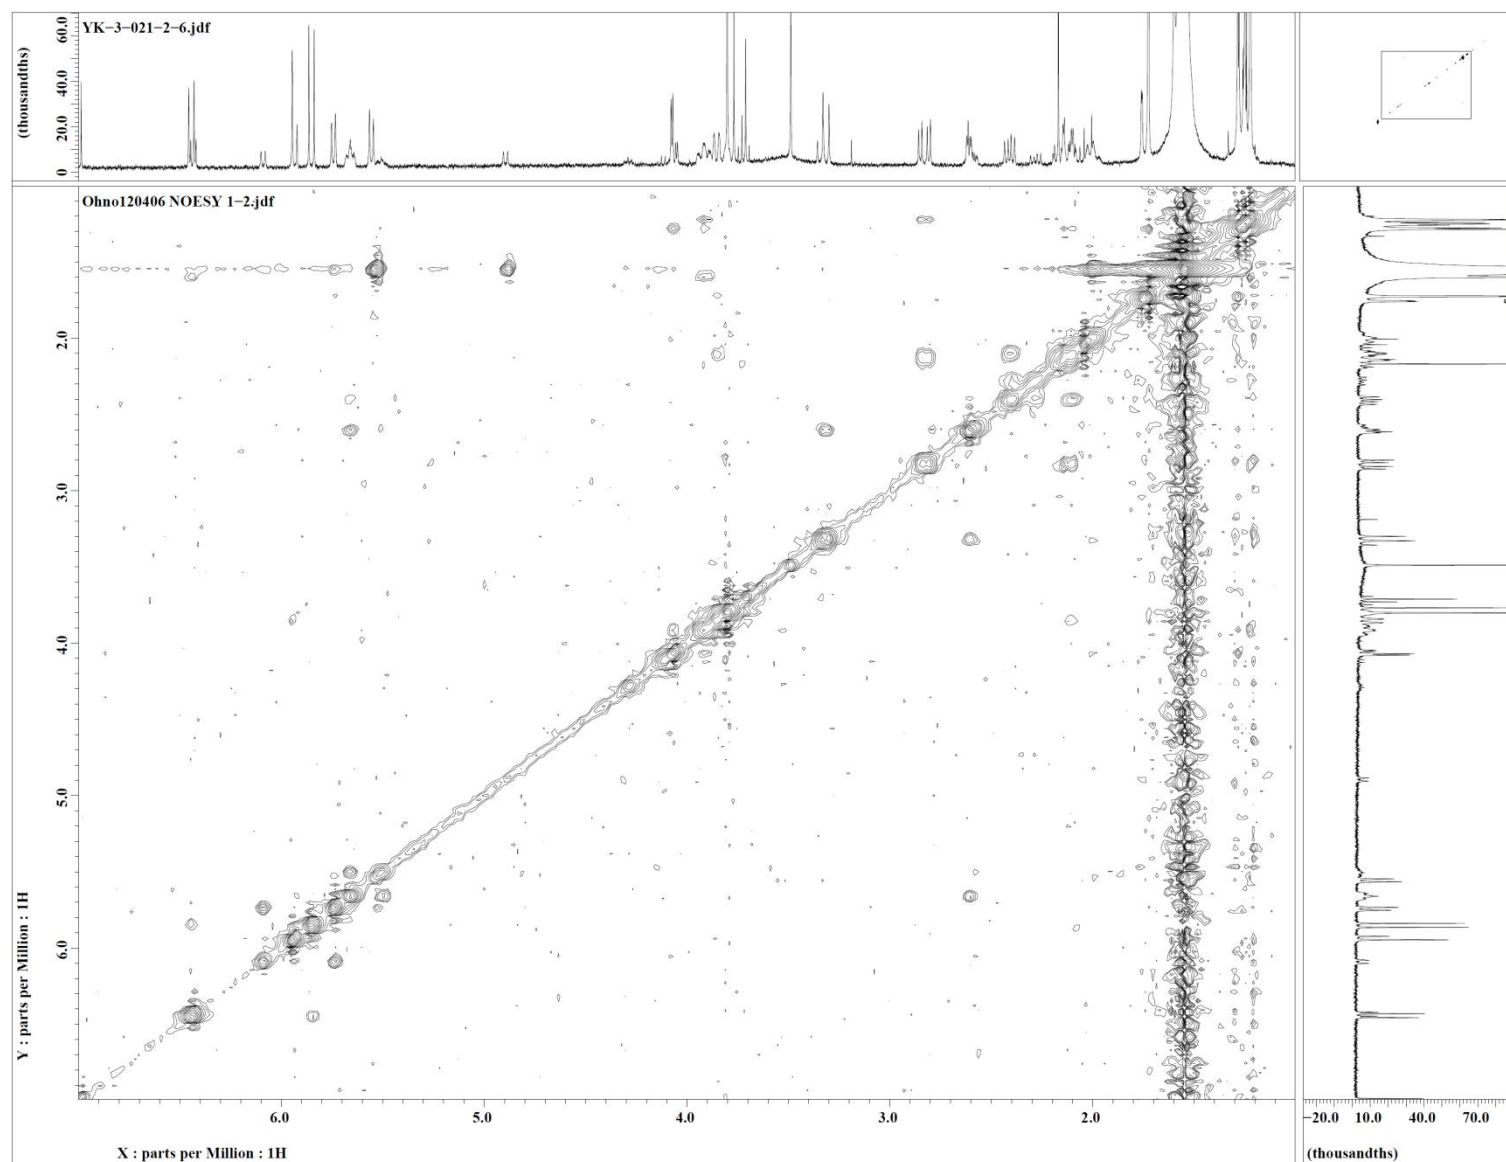

Figure S13. IR spectrum of compound 2 (neat).

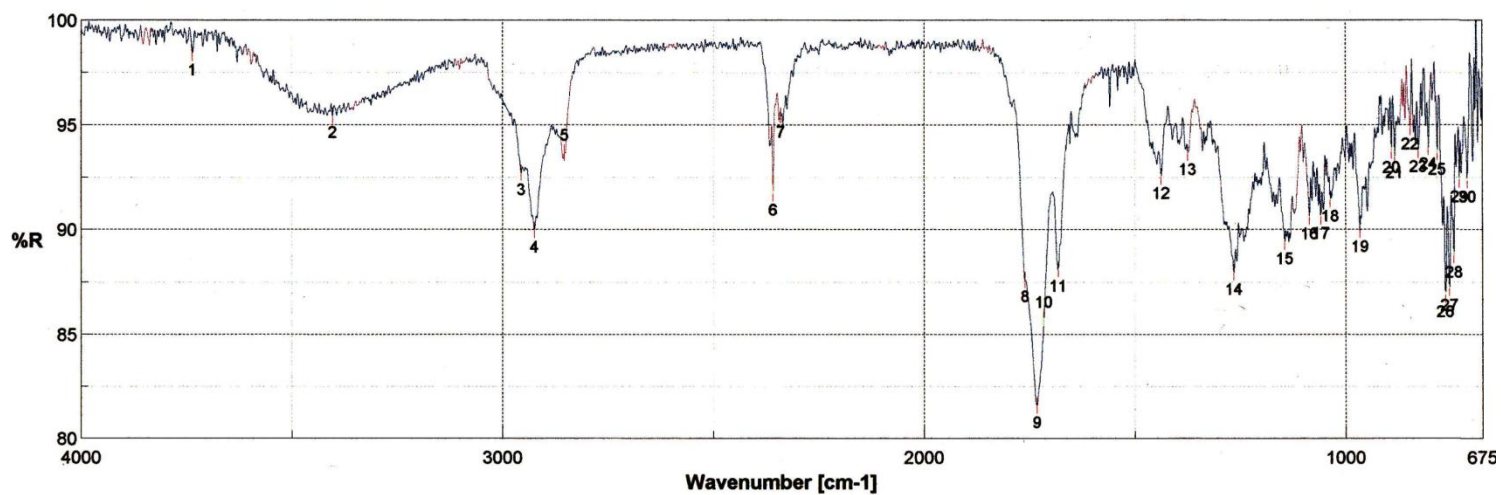

積算回数  
ゼロフィリング  
ゲイン  
スキャンスピード  
測定日時  
測定者  
ファイル名  
サンプル名  
コメント

32  
ON  
32  
2 mm/sec  
2012/04/11 12:18  
オペレータ  
Memory#1  
試料名  
コメント

分解  
アポダイゼーション  
アパーチャー  
更新日時

2 cm-1  
Cosine  
5 mm  
2012/04/11 12:32

| No. | cm-1    | %R      | No. | cm-1    | %R      | No. | cm-1    | %R      | No. | cm-1    | %R      |
|-----|---------|---------|-----|---------|---------|-----|---------|---------|-----|---------|---------|
| 1   | 3735.44 | 98.4273 | 2   | 3402.3  | 95.4418 | 3   | 2954.89 | 92.716  | 4   | 2924.04 | 89.9787 |
| 6   | 2358.03 | 91.7357 | 7   | 2340.19 | 95.4613 | 8   | 1761.17 | 87.5988 | 9   | 1732.25 | 81.5672 |
| 11  | 1682.11 | 88.1091 | 12  | 1437.19 | 92.5472 | 13  | 1374.51 | 93.674  | 14  | 1265.07 | 87.9563 |
| 16  | 1085.24 | 90.6117 | 17  | 1058.25 | 90.63   | 18  | 1036.07 | 91.4532 | 19  | 966.162 | 89.9824 |
| 21  | 882.756 | 93.5339 | 22  | 845.633 | 94.8938 | 23  | 826.348 | 93.8056 | 24  | 802.724 | 93.9536 |
| 26  | 762.227 | 86.8777 | 27  | 753.066 | 87.1809 | 28  | 742.46  | 88.765  | 29  | 729.443 | 92.3681 |
|     |         |         |     |         |         |     |         |         | 5   | 2852.68 | 93.6818 |
|     |         |         |     |         |         |     |         |         | 10  | 1715.85 | 85.7094 |
|     |         |         |     |         |         |     |         |         | 15  | 1143.58 | 89.4146 |
|     |         |         |     |         |         |     |         |         | 20  | 889.987 | 93.7818 |
|     |         |         |     |         |         |     |         |         | 25  | 781.511 | 93.6719 |
|     |         |         |     |         |         |     |         |         | 30  | 710.64  | 92.3764 |
